# Supplementary material
Source: Research Square preprint supplement (doi:10.21203/rs.3.rs-8160445/v1)
Supplement: Supplementary file 1 [file 1fca5bc02e7c0648bdf5d23e.xlsx]

## Sheet: Sheet1
Blood					BALF
HMGB1	Unit:ng/mL				HMGB1	Unit:ng/mL
	Control	PA	FPS-ZM1+ PA			Control	PA	FPS-ZM1+ PA
A	1.45821	3.56558	2.77755		A	0.858782	4.0894	3.18886
B	1.51869	3.51624	2.63731		B	0.982242	4.08292	3.45723
C	1.54619	3.47122	2.57092		C	1.35012	3.94113	3.60274
RAGE	Unit:ng/mL				RAGE	Unit:ng/mL
	Control	PA	FPS-ZM1+ PA			Control	PA	FPS-ZM1+ PA
A	3.84	8.538	5.476		A	4.958	9.788	7.424
B	3.994	8.12	5.476		B	4.47	10.122	7.658
C	4.066	7.798	5.624		C	4.562	10.102	7.618
TNF-α	Unit:pg/ml				TNF-α	Unit:pg/ml
	Control	PA	FPS-ZM1+ PA			Control	PA	FPS-ZM1+ PA
A	214.432	395.102	350.404		A	17.922	268.772	106.376
B	217.712	392.076	361.024		B	18.192	277.798	123.658
C	218.866	389.798	372.904		C	18.192	293.28	130.744
IL-6	Unit:pg/ml				IL-6	Unit:pg/ml
	Control	PA	FPS-ZM1+ PA			Control	PA	FPS-ZM1+ PA
A	22.538	83.23	50.886		A	124.664	266.546	186.434
B	23.444	77.988	52.856		B	131.192	287.728	186.736
C	47.366	76.8	56.216		C	139.184	319.816	208.084
IL-1β	Unit:pg/ml				IL-1β	Unit:pg/ml
	Control	PA	FPS-ZM1+ PA			Control	PA	FPS-ZM1+ PA
A	12.896	33.052	18.938		A	21.254	40.968	22.188
B	13.4	32.858	19.592		B	21.338	42.11	23.48
C	14.352	29.064	19.674		C	23.306	47.966	31.8
