# Supplementary material
Source: Research Square preprint supplement (doi:10.21203/rs.3.rs-8160445/v1)
Supplement: Supplementary file 2 [file 602aacf93fa900390176fa7e.xlsx]

## Sheet: Sheet1
Control	wet weight	Dry weight	Results		PA	wet weight	Dry weight	Results		FPS-ZM1+ PA	wet weight	Dry weight	Results
Sample1	0.389	0.094	4.1383		Sample1	0.643	0.096	6.69792		Sample1	0.449	0.082	5.47561
Sample2	0.482	0.099	4.86869		Sample2	0.633	0.094	6.73404		Sample2	0.479	0.09	5.32222
Sample3	0.433	0.098	4.41837		Sample3	0.637	0.098	6.5		Sample3	0.478	0.089	5.37079
Sample4	0.378	0.099	3.81818		Sample4	0.55	0.099	5.55556		Sample4	0.493	0.099	4.9798
Sample5	0.449	0.092	4.88043		Sample5	0.643	0.094	6.84043		Sample5	0.545	0.099	5.50505
Sample6	0.486	0.098	4.95918		Sample6	0.579	0.097	5.96907		Sample6	0.51	0.088	5.79545
