# Supplementary material
Source: Research Square preprint supplement (doi:10.21203/rs.3.rs-8160445/v1)
Supplement: Supplementary file 3 [file 967d8f84c391f6bcebd89d42.xlsx]

## Sheet: Sheet1
Control		PA		FPS-ZM1+ PA
1		4		2
1		4		3
1		4		3
1		3		3
1		4		2
1		4		2
